# Supplementary material for: C3A Cells-Inoculated Affinity Membrane for Bilirubin Removal
Source: MDPI journal article supplement (doi:10.3390/coatings13010050), 2022-12-27
Supplement: s1 [file s1]

**Table S1.** The effect of PDA coating time on the absorbance of BSA permeate solution.

| membrane | Contact angle(°) |
|----------|------------------|
| 0        | 0.1096           |
| 2        | 0.0982           |
| 4        | 0.0847           |
| 6        | 0.0787           |
| 8        | 0.0703           |
| 10       | 0.0558           |
| 12       | 0.0498           |
| 24       | 0.0449           |

**Table S2.** Adsorption rates of bilirubin on the membranes.

| time | bilirubin concentration (mg/mL) |          |              |
|------|---------------------------------|----------|--------------|
|      | iPES                            | iPES/PDA | iPES/PDA/Lys |
| 0.5  | 198.0                           | 198.8    | 196.1        |
| 1    | 194.9                           | 192.9    | 189.2        |
| 1.5  | 194.8                           | 190.7    | 183.5        |
| 2    | 194.0                           | 189.0    | 181.1        |
| 2.5  | 194.1                           | 188.0    | 179.6        |
| 3    | 194.0                           | 185.3    | 176.8        |
| 3.5  | 194.0                           | 185.2    | 177.1        |
| 4    | 194.0                           | 185.1    | 176.4        |
| 4.5  | 193.8                           | 185.6    | 176.2        |

**Table S3.** The bilirubin concentrations before and after adsorption with membranes.

| bilirubin initial concentration (mg/mL) | bilirubin equilibrium concentration (mg/mL) |          |              |
|-----------------------------------------|---------------------------------------------|----------|--------------|
|                                         | iPES                                        | iPES/PDA | iPES/PDA/Lys |
| 100                                     | 96.2                                        | 91.3     | 87.1         |
| 150                                     | 145.3                                       | 138.9    | 130.9        |
| 200                                     | 194.0                                       | 185.5    | 176.5        |
| 250                                     | 243.9                                       | 235.2    | 227.1        |
| 300                                     | 294.2                                       | 285.3    | 276.5        |
